# Supplementary material for: Nanoaggregates of Biphilic Carboxyl-Containing Copolymers as Carriers for Ionically Bound Doxorubicin
Source: MDPI journal article supplement (doi:10.3390/ma15207136), 2022-10-13
Supplement: s1 [file s1]

## Supplementary Materials

### Nomenclature of used abbreviations and values

AA – acrylic acid;

AFM – atomic force microscopy;

AIBN – azobisisobutyronitrile;

$C_{IDOX}$  – concentration of doxorubicin immobilized through electrostatic interactions;

$C_{COOH}$  – concentration of acrylic acid residues in the system;

$C_{DOX} = C_{DOX}^{max} - C_{IDOX}$  – concentration of free doxorubicin;

$C_{DOX}^{max}$  – the maximum concentration of doxorubicin that would have been achieved upon its complete release;

$\overline{C_{DOX}}$  is the equilibrium concentration of free doxorubicin;

$\Delta G_T^0$  – standard Gibbs energy of doxorubicin release;

$\Delta H_T^0$  – standard enthalpy of release of doxorubicin;

$k_1$  - doxorubicin release rate constant;

$k_{-1} = k'_{-1} C_{COOH}$  – doxorubicin binding rate constant;

$k'_{-1}$  – doxorubicin binding rate constant normalized to the concentration of carboxyl groups;

$K$  - doxorubicin release equilibrium constant;

n-ODM – n-octadecylmercaptan;

$\Delta S_T^0$  – standard entropy of release of doxorubicin;

TEM – transmission electron microscopy;

$t$  – time;

VP – N-vinyl-2-pyrrolidone;

$x^{(r)}$  – mole fraction of acrylic acid in the reaction mixture;

$x^{(c)}$  – mole fraction of acrylic acid in the copolymer;

$\xi$  and  $\xi_{\infty}$  are the conversion and equilibrium conversion of doxorubicin release.
